# Supplementary material
Source: PubMed Central journal article supplement (PMC6446242)

Figure S1

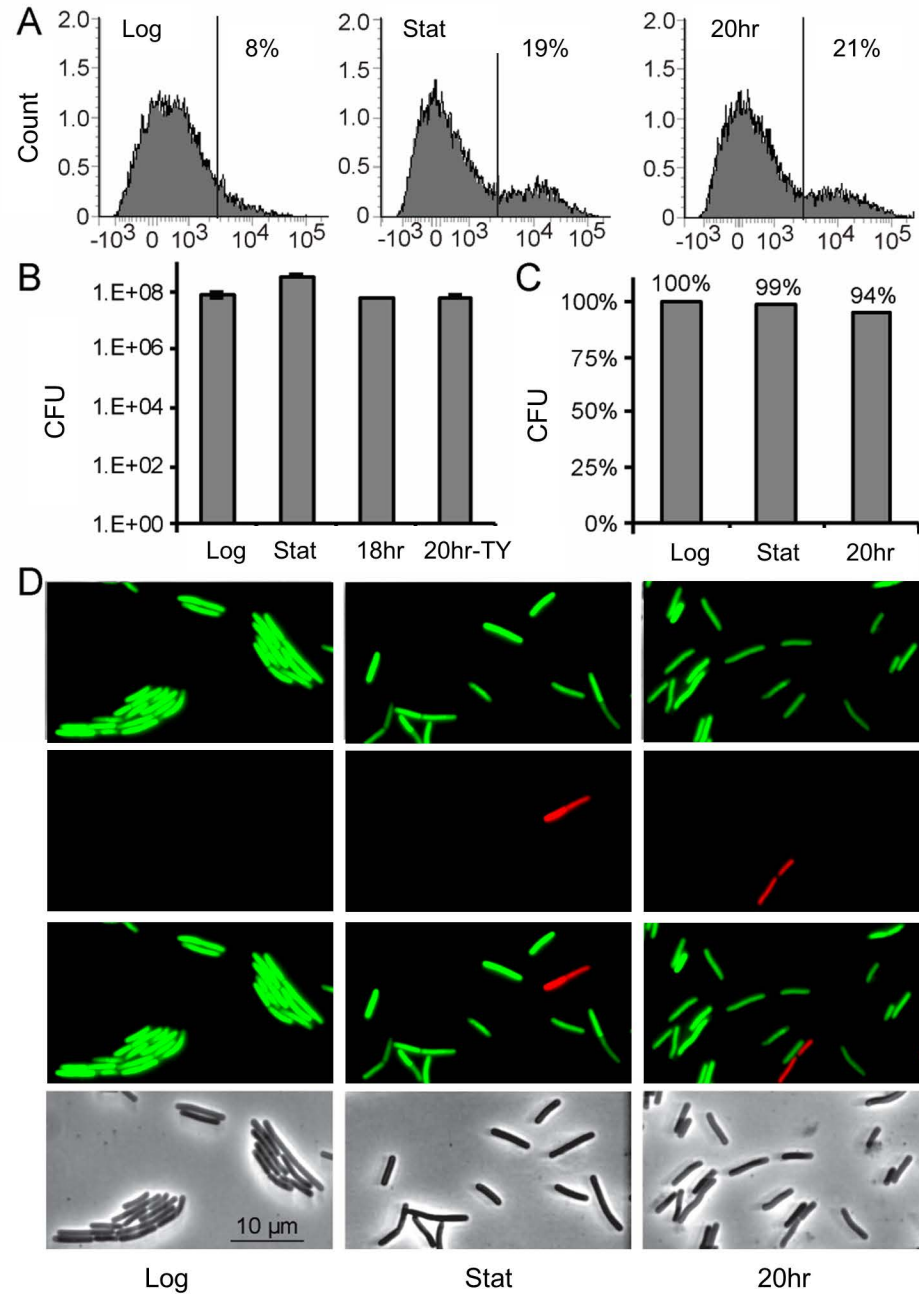

Figure S2

```
CD196 AGTAATGGTAGATATAATAAAAATATTAACAAATAAAAAAGTGTTATCCAAATAAGAATAG CTGAAAGTTATCATAATTCATGAAACTGATAATGAAAACGAGGGAGCAGATGCCAAGAGA 120
R20291 AGTAATGGTAGATATAATAAAAATATTAACAAATAAAAAAGTGTTATCCAAATAAGAATAG CTGAAAGTTATCATAATTCATGAAACTGATAATGAAAACGAGGGAGCAGATGCCAAGAGA 120
VPI10463 AGTAATGGTAGATATAATAAAAATATTAACAAATAAAAAAGTGTTATCCAAATAAGAATAG CTGAAAGTTATCATAATTCATGAAACTAATAATGAAAACGAGGGAGCAGATGCCAAGAGA 120
CD630 AGTAATGGTAGATATAATAAAGATATTAACAAATAAAAAAGTGTTATCCAAATAAGAATAG CTGAAAGTTATCATAATTCATGAAACTAATAATGAAAACGAGGGAGCAGATGCCAAGAGA 120
NAP07 AGTACTGGTAGATATAATAAAGATATTAACAAATAAAAAAGTGTTATCCAAATAAGAATAG CTGAAAGTTATCATAATTCATGAAACTGATAATGAAAACGAGGGAGCAGATGCCAAGAGA 120
NAP08 AGTACTGGTAGATATAATAAAGATATTAACAAATAAAAAAGTGTTATCCAAATAAGAATAG CTGAAAGTTATCATAATTCATGAAACTGATAATGAAAACGAGGGAGCAGATGCCAAGAGA 120
*****

CD196 CACACAAGTATTAATACATATAAATTCGAAGCAAGTGTTTACTACTATATGGATGACAA GGTAGTATATCAAACATTGGTTCACAAAGATGGTGCATGGTCAGTTGGTAAAACTTATTA 240
R20291 CACACAAGTATTAATACATATAAATTCGAAGCAAGTGTTTACTACTATATGGATGACAA GGTAGTATATCAAACATTGGTTCACAAAGATGGTGCATGGTCAGTTGGTAAAACTTATTA 240
VPI10463 CACACAAGTATTAATACATATAAATTCGAAGCAAGTGTTTACTACTATATAGATGACAA GGTAGTATATCAAACATTGGTTCACAAAGATGGTGCATGGTCAGTTGGTAAAACTTATTA 240
CD630 CACACAAGTATTAATACATATAAATTCGAAGCAAGTGTTTACTACTATATAGATGACAA GGTAGTATATCAAACATTGGTTCACAAAGATGGTGCATGGTCAGTTGGTAAAACTTATTA 240
NAP07 CACACAAGTATTAATACATATAAATTCGAAGCAAGTGTTTACTACTATATGGATGACAA GGTAGTATATCAAACATTGGTTCACAAAGATGGTGCATGGTCAGTTGGTAAAACTTATTA 240
NAP08 CACACAAGTATTAATACATATAAATTCGAAGCAAGTGTTTACTACTATATGGATGACAA GGTAGTATATCAAACATTGGTTCACAAAGATGGTGCATGGTCAGTTGGTAAAACTTATTA 240
*****

CD196 AGCTACATTAGTTACAGATATCACAACCTATAATAGTTAAACATAGAAATATGTGTAAT TGTGATGGAAATTATTCAAAAACACAAAAATACGTGATGAAGGACAAAAATGATAGAGAAA 360
R20291 AGCTACATTAGTTACAGATATCACAACCTATAATAGTTAAACATAGAAATATGTGTAAT TGTGATGGAAATTATTCAAAAACACAAAAATACGTGATGAAGGACAAAAATGATAGAGAAA 360
VPI10463 AGCTACATTAGTTACAGATATCACAACCTATAATAGTTAAACATAGAAATATGTGTAAT TGTGATGGAAATTATTCAAAAACACAAAAATACGTGATGAAGGACAAAAATGATAGAGAAA 360
CD630 AGCTACATTAGTTACAGATATCACAACCTATAATAGTTAAACATAGAAATATGTGTAAT TGTGATGGAAATTATTCAAAAACACAAAAATACGTGATGAAGGACAAAAATGATAGAGAAA 360
NAP07 AGCTACATTAGTTACAGATATCACAACCTATAATAGTTAAACATAGAAATATGTGTAAT TGTGATGGAAATTATTCAAAAACACAAAAATACGTGATGAAGGACAAAAATGATAGAGAAA 360
NAP08 AGCTACATTAGTTACAGATATCACAACCTATAATAGTTAAACATAGAAATATGTGTAAT TGTGATGGAAATTATTCAAAAACACAAAAATACGTGATGAAGGACAAAAATGATAGAGAAA 360
*****

CD196 ATAAGTATCAAACCTTAATAAATGATTTAATTGATAGTTTAAAAGTTATAGGAAAAATAT ATAAGAAATAAAAACATTAATAAATATAAGATATGTTTACAAATTACTATCAGACAAT 480
R20291 ATAAGTATCAAACCTTAATAAATGATTTAATTGATAGTTTAAAAGTTATAGGAAAAATAT ATAAGAAATAAAAACATTAATAAATATAAGATATGTTTACAAATTACTATCAGACAAT 480
VPI10463 ATAAGTATCAAACCTTAATAAATGATTTAATTGATAGTTTAAAAGTTATAGGAAAAATAT ATAAGAAATAAAAACATTAATAAATATAAGATATGTTTACAAATTACTATCAGACAAT 480
CD630 ATAAGTATCAAACCTTAATAAATGATTTAATTGATAGTTTAAAAGTTATAGGAAAAATAT ATAAGAAATAAAAACATTAATAAATATAAGATATGTTTACAAATTACTATCAGACAAT 480
NAP07 ATAAGTATCAAACCTTAATAAATGATTTAATTGATAGTTTAAAAGTTATAGGAAAAATAT ATAAGAAATAAAAACATTAATAAATATAAGATATGTTTACAAATTACTATCAGACAAT 480
NAP08 ATAAGTATCAAACCTTAATAAATGATTTAATTGATAGTTTAAAAGTTATAGGAAAAATAT ATAAGAAATAAAAACATTAATAAATATAAGATATGTTTACAAATTACTATCAGACAAT 480
*****

-10
CD196 CTCCCTTATCTAATAGAGAGTCAATTAACCTAATTGAGTATCTTTAAATTGAAATGTTAGG AAGTGATTTAAATATGAAAACCTAAATTATAAAAAATCAATATTAATTTATCTTTAAAAA 600
R20291 CTCCCTTATCTAATAGAGAGTCAATTAACCTAATTGAGTATCTTTAAATTGAAATGTTAGG AAGTGATTTAAATATGAAAACCTAAATTATAAAAAATCAATATTAATTTATCTTTAAAAA 600
VPI10463 CTCCCTTATCTAATAGAGAGTCAATTAACCTAATTGAGTATCTTTAAATTGAAATGTTAGG AAGTGATTTAAATATGAAAACCTAAATTATAAAAAATCAATATTAATTTATCTTTAAAAA 600
CD630 CTCCCTTATCTAATAGAGAGTCAATTAACCTAATTGAGTATCTTTAAATTGAAATGTTAGG AAGTGATTTAAATATGAAAACCTAAATTATAAAAAATCAATATTAATTTATCTTTAAAAA 600
NAP07 CTCCCTTATCTAATAGAGAGTCAATTAACCTAATTGAGTATCTTTAAATTGAAATGTTAGG AAGTGATTTAAATATGAAAACCTAAATTATAAAAAATCAATATTAATTTATCTTTAAAAA 600
NAP08 CTCCCTTATCTAATAGAGAGTCAATTAACCTAATTGAGTATCTTTAAATTGAAATGTTAGG AAGTGATTTAAATATGAAAACCTAAATTATAAAAAATCAATATTAATTTATCTTTAAAAA 600
*****

-35
CD196 ATAGAAAGGAGTGTATAAGATTTATTTCAAAGTTAAAAACAAGAAAATCAATTTAAAT TTCAGAAGGAATAAATGTGGTTATAGAAGTGGATTTATTAATCAAAAAATAATAGTACTAGG 728
R20291 ATAGAAAGGAGTGTATAAGATTTATTTCAAAGTTAAAAACAAGAAAATCAATTTAAAT TTCAGAAGGAATAAATGTGGTTATAGAAGTGGATTTATTAATCAAAAAATAATAGTACTAGG 728
VPI10463 ATAGAAAGGAGTGTATAAGATTTATTTCAAAGTTAAAAACAAGAAAATCAATTTAAAT TTCAGAAGGAATAAATGTGGTTATAGAAGTGGATTTATTAATCAAAAAATAATAACTACTAGG 728
CD630 ATAGAAAGGAGTGTATAAGATTTATTTCAAAGTTAAAAACAAGAAAATCAATTTAAAT TTCAGAAGGAATAAATGTGGTTATAGAAGTGGATTTATTAATCAAAAAATAATAACTACTAGG 728
NAP07 ATAGAAAGGAGTGTATAAGATTTATTTCAAAGTTAAAAACAAGAAAATCAATTTAAAT TTCAGAAGGAATAAATGTGGTTATAGAAGTGGATTTATTAATCAAAAAATAATAACTACTAGG 728
NAP08 ATAGAAAGGAGTGTATAAGATTTATTTCAAAGTTAAAAACAAGAAAATCAATTTAAAT TTCAGAAGGAATAAATGTGGTTATAGAAGTGGATTTATTAATCAAAAAATAATAACTACTAGG 728
*****
```

Figure S3

A

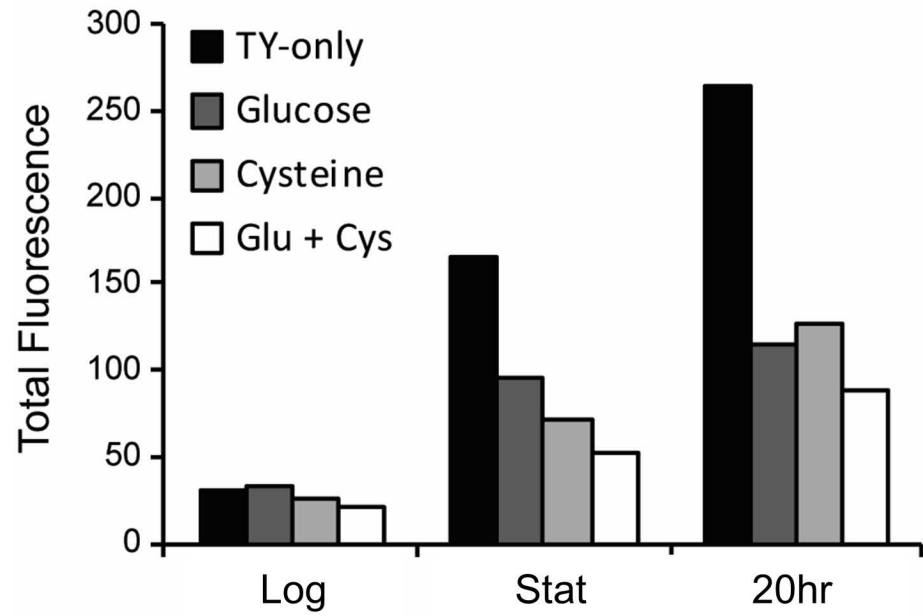

B

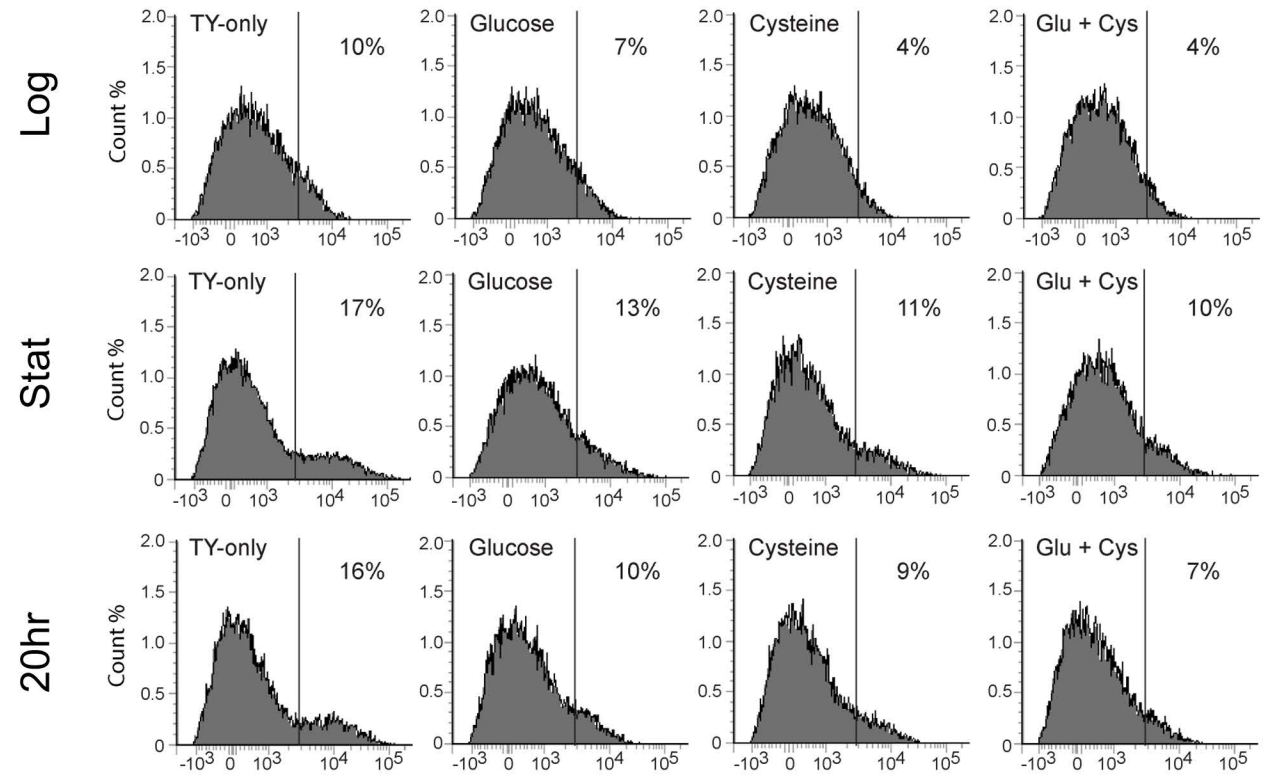

Figure S4

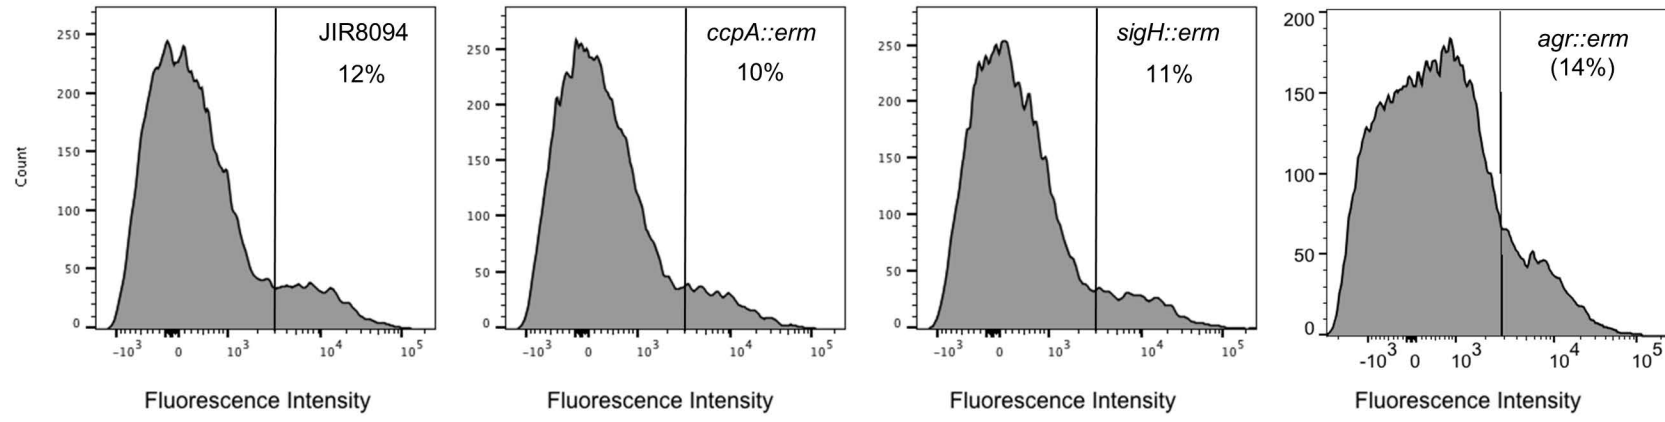

Figure S5

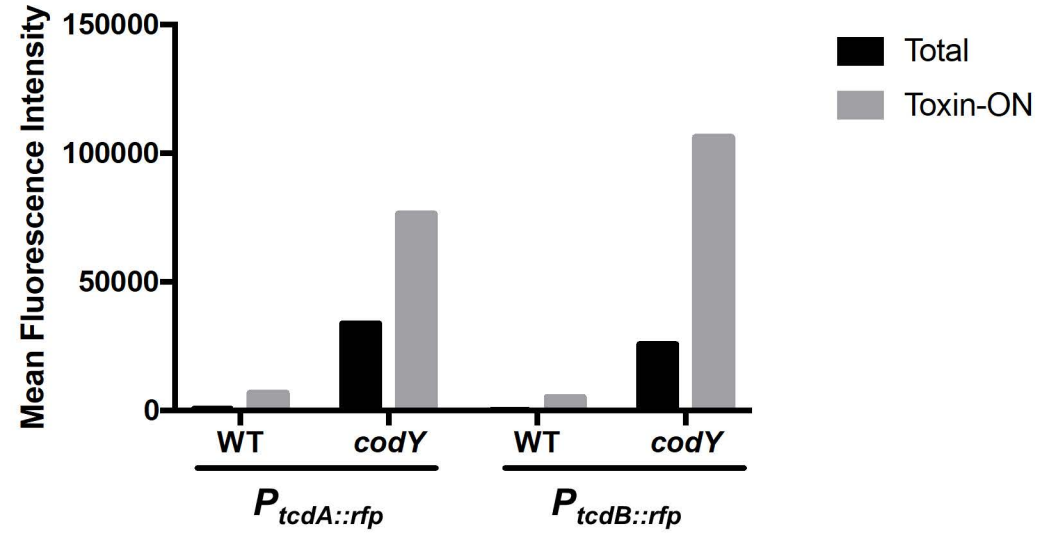

Supplement: NIHMS1019384-supplement-Supp_FigS1-5.pdf [file NIHMS1019384-supplement-Supp_FigS1-5.pdf]
